# Supplementary material for: Epidural Electrical Stimulation of the Cervical Dorsal Roots Restores Voluntary Upper Limb Control in Paralyzed Monkeys
Source: bioRxiv or medRxiv preprint supplement (doi:10.1101/2020.11.13.379750), 2021-11-08
Supplement: Supplementary file [file media-6.pdf]

## Supplementary data

| Animal ID | Sex | Age  | Weight | SCI | Anesthetized Experiments                      | Behavioral experiments | Brain array position | Brain - Controlled EES |
|-----------|-----|------|--------|-----|-----------------------------------------------|------------------------|----------------------|------------------------|
| Mk-Sa     | F   | 9 Yr | 4 kg   | yes | Recruitment curves                            | Reach only             | M1 and PMd           | no                     |
| Mk-Br     | F   | 3 Yr | 3.4 kg | yes | Recruitment curves and single joint movements | Reach and pull         | S1, M1 and PMv       | yes                    |
| Mk-Yg     | F   | 3 Yr | 2.9 kg | yes | Recruitment curves and single joint movements | Reach and pull         | S1, M1 and PMv       | yes                    |

**Supplementary Table 1:** Identification information, license numbers, characteristics and type of procedure performed for the three monkeys involved in the study

|                              | Reach           |                 | Grasp            |                 | Pull            |                  |
|------------------------------|-----------------|-----------------|------------------|-----------------|-----------------|------------------|
| mean $\pm$ std (success/min) | No Stim         | Stim            | No stim          | Stim            | No Stim         | Stim             |
| Mk-Yg                        | 0.48 $\pm$ 0.13 | 0.53 $\pm$ 0.06 | 0.07 $\pm$ 0.049 | 0.1 $\pm$ 0.03  | 0 $\pm$ 0       | 0.015 $\pm$ 0.01 |
| Mk-Br                        | 3.08 $\pm$ 0.32 | 3.21 $\pm$ 0.29 | 0.51 $\pm$ 0.13  | 1.06 $\pm$ 0.16 | 0.07 $\pm$ 0.05 | 0.24 $\pm$ 0.07  |
| Mk-Sa                        | 0 $\pm$ 0       | 0.13 $\pm$ 0.06 | N.A.             | N.A.            | N.A.            | N.A.             |

**Supplementary Table 2:** Mean and standard deviation values for non-normalized values of task performance frequency shown in Figure 4C.

**Video 1:** Single-joint movements elicited by pulse trains of EES at different segmental locations. Shoulder abduction: stimulation at C5; Elbow extension: stimulation at C7; Finger flexion: stimulation at T1; reach, grasp and pull sequence: cascade stimulation at C7, T1 and C5.

**Video 2:** Effects of EES on reach movement performance on Mk-Sa. Top left: lateral vision of the animal performing the task; Bottom left: delivered stimulation pulses; Top right: electromyographic activity from Deltoid, Biceps and Triceps muscles; Bottom right: neural activity from M1 and PMd cortex.

**Video 3:** Effects of brain-controlled EES on reach and pull movement performance on Mk-Br Top left: lateral vision of the animal performing the task; Middle left: delivered stimulation pulses; Bottom left: pulling force applied on the robot end effector; Top right: neural activity from S1, M1 and PMd cortex; Bottom right: electromyographic activity from Deltoid, Flexor Carpi radialis and Abductor Pollicis.

**Video 4:** Effects of EES on pull movement performance on Mk-Yg. Top left: lateral vision of the animal performing the task; Middle left: delivered stimulation pulses;

Bottom left: pulling force applied on the robot end effector; Top right: neural activity from S1, M1 and PMd cortex; Bottom right: electromyographic activity from Biceps, Triceps, Extensor Digitorium Communis and Flexor Digitorum Superficialis.

**Video 5:** Effects of a EES burst optimized to recover pull, delivered during a reach movement on Mk-Yg. Lateral view of the animal performing the task.

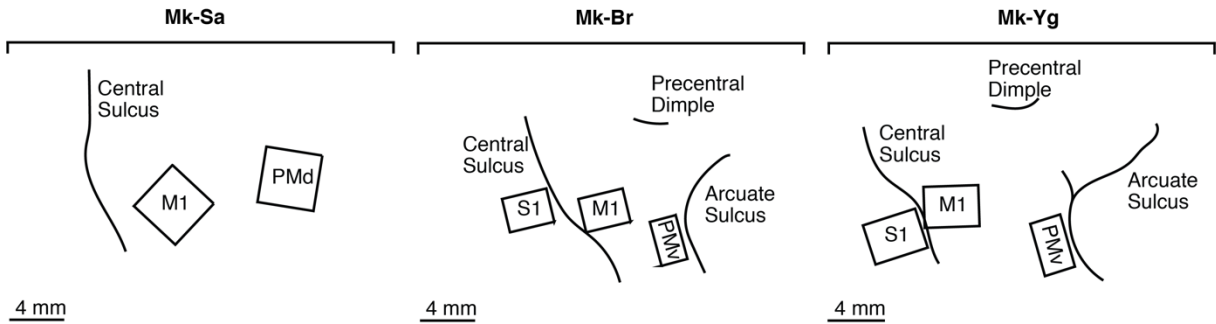

**Supplementary Figure 1: Position of intracortical arrays.** Location of intracortical arrays implanted in the sensory (S1), Motor (M1) and dorsal or ventral premotor (PMd, PMv) cortex in the three monkeys.
